# Supplementary material for: Dynamic basis of lipopolysaccharide export by LptB2FGC
Source: eLife journal article supplement (doi:10.7554/elife.99338), 2024-07-01

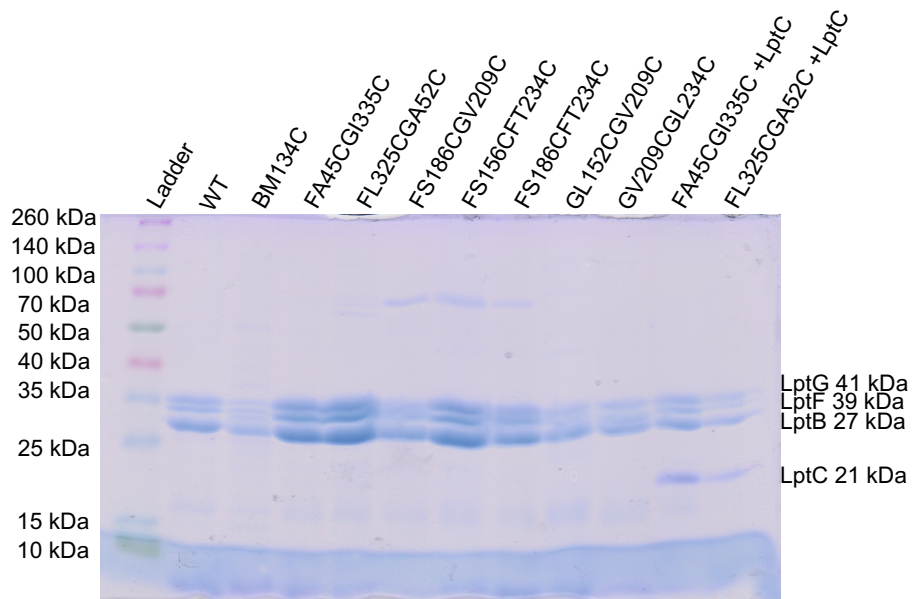

Supplement: fig2-figsupp2-data2 [file elife-99338-fig2-figsupp2-data2-v1.pdf]
